# Supplementary material
Source: Atypon-hosted journal article supplement (https://705.library.nashville.org/Record/CARL0000223864/DownloadSupplementalFile?fileId=110)
Supplement: DownloadSupplementalFile [file DownloadSupplementalFile]

## ***Tennessean* Tribute to America Collection, 2001-2002**

### **Collection Summary**

**Creator:** *Tennessean* (Nashville, Tenn.), collector.

**Title:** *Tennessean* Tribute to America Collection

**Inclusive Dates:** 2001-2002

**Summary/Abstract:** Essays, poems, and songs submitted by the public to the *Tennessean* newspaper in observance of the one year anniversary of the Sept. 11, 2001 terrorist attacks.

**Physical Description/Extent:** 1 cu. ft.

**Series:** I. Essays

II. Poems

III. Photographs

IV. Songs and music

**Accession Number:** 2002.071

**Language:** English

**Stack Location:** Closed stacks West storage range 2 section 1

**Repository:** Special Collections Division, Nashville Public Library, 615 Church Street, Nashville, TN 37219

### **Chronology**

|                  |                                                                                                                                                                                                                                                                                                                                                                                                                |
|------------------|----------------------------------------------------------------------------------------------------------------------------------------------------------------------------------------------------------------------------------------------------------------------------------------------------------------------------------------------------------------------------------------------------------------|
| Sept. 11, 2001   | Terrorists hijack passenger airplanes to attack the World Trade Center in New York City, and the Pentagon in Washington, DC. A fourth airplane crashes in Pennsylvania before it can reach its target, having been prevented from doing so by passengers on-board. All four plane crashes kill a total of 3,025 people, many of them in New York City when the Twin Towers of the World Trade Center collapse. |
| Oct. 7, 2001     | Pres. George W. Bush announces Operation Enduring Freedom, military action against the Taliban and Al Qaeda forces in Afghanistan.                                                                                                                                                                                                                                                                             |
| Oct. – Nov. 2001 | Anthrax attacks, primarily through the mails, strike Congressional offices and elsewhere.                                                                                                                                                                                                                                                                                                                      |
| Aug. 2002        | The <i>Tennessean</i> newspaper solicits essays, notices of special commemorative events, and children's artwork from the public for inclusion in a special commemorative section in the newspaper on the one-year anniversary of the attacks.                                                                                                                                                                 |
| Sept. 11, 2002   | The <i>Tennessean</i> publishes a special commemorative section in the newspaper in observance of the one-year anniversary of the terrorist attacks. Although space does not allow for all materials submitted to be reproduced in the newspaper, the <i>Tennessean's</i> website includes many more submissions.                                                                                              |

- Oct. 2002                      The original essays, poems, and a few photographs and songs, contributed by the public to the *Tennessean* are donated to the Special Collections Division of the Nashville Public Library.
- Oct. 11, 2002                Congress passes a joint resolution authorizing President Bush to use military force against Iraq.

### **Biographical/Historical Sketch**

The *Nashville Tennessean* newspaper was begun in 1907 by Luke Lea. Known by a variety of names in the early twentieth century, due to mergers and acquisitions, by the Depression of the 1930's the paper was struggling. By 1933, the *Nashville Tennessean* was placed into receivership, administered by Lit J. Pardue of Ashland City. By 1937 the paper's circulation had increased by more than 50,000. In 1937, Silliman Evans became publisher. He and *Nashville Banner* publisher James Stahlman formed Newspaper Printing Corp. to serve as business agent for both newspapers, becoming a model for the newspaper industry throughout the country. As part of the agreement, the *Nashville Tennessean* ceased publication of its afternoon editions, and the *Nashville Banner* ceased Sunday publication. Silliman Evans, Jr. became publisher when his father died in 1955, and when the younger Evans died in 1961, he was succeeded by his brother, Amon Carter Evans. In 1962, John Seigenthaler became editor, and reporters Nat Caldwell and Gene Graham received the Pulitzer Prize for their story about "undercover cooperation" between mine management and the United Mine Workers. In 1972, the newspaper dropped Nashville from its title, becoming simply *The Tennessean* to reflect its statewide coverage. Seigenthaler was named as publisher in 1974, became chairman and chief executive officer in 1989, and at his retirement in 1991, was named chairman emeritus. The Evans family continued as owners until July 6, 1979, when the paper was sold to Gannett Co. Inc. for around \$50 million.

In Aug. 2002, the *Tennessean* newspaper asked its readers to submit essays, notices of special events, and children's artwork related to the one year anniversary of the terrorist attacks which occurred on Sept. 11, 2001. Some of these submissions were published in a special commemorative section in the newspaper on Sept. 11, 2002, and many appeared on the *Tennessean's* website. These materials, excluding children's artwork, were obtained by the Nashville Room from the *Tennessean* in October 2002.

### **Scope and Contents of the Collection**

Readers of the *Tennessean* sent in essays, poems, songs, and other items to the newspaper concerning their thoughts and feelings about the one year anniversary of the terrorist attacks of Sept. 11, 2001. Some reflected on how their feelings have changed since that time; others wrote about their experiences on that day. Submissions came from communities throughout Middle Tennessee, although the majority of submissions were from the Nashville metropolitan area. A few submissions came from out of state. Several schools made group contributions to the project. Although the *Tennessean* requested submissions of children's artwork, these materials were not included in the donation to the Nashville Room. However, occasionally children's writings will be accompanied by

illustrations, and the entire submission from St. Joseph School in Madison, Tenn. consists of both brief essays and crayon illustrations, predominantly from third graders.

The essays and other materials provide an interesting snapshot of America and Middle Tennessee when the nation was still grieving its losses from the year before. Daily life had resumed some sense of normalcy, but was still punctuated by warnings, scares, and a mix of fear and optimistic confidence. These materials provide a unique view of America during a specific time in the “War on Terror.” Military action had been underway for nearly a year in Afghanistan, but had not yet been authorized in Iraq. At the time most of these essays were written in Aug. and Sept. 2002, government officials were stating that Iraq posed an imminent threat to the United States, both at home and abroad. Congress would pass a joint resolution authorizing military force against Iraq on Oct. 11, 2002.

Most submissions speak directly to the events of Sept. 11, 2001, including recollections of individuals’ experiences on that day. In a few instances, people submitted writings which dated from the time period of the attacks. Regardless of when they were written, a number of submissions detail where people were and what they were doing on Sept. 11, 2001. In some cases, they may have lost friends or relatives in the attack, or they write about family members who are in the military, or members of police, fire, or medical teams. Some individuals write about being in mid-flight and having their airplane suddenly grounded at an unexpected location, being stranded in airports in the United States, or their experiences traveling abroad at that time. In addition to individuals’ accounts about their experiences on Sept. 11, 2001, many submissions also reflect on events that had transpired in the year since that time.

The content and subject matter of the submissions varies widely. Many persons express fear and concern for their loved ones and their country, while remaining confident in their nation’s strength, fortitude, and endurance. Some individuals express moral judgments about events, leaders, the United States, foreign countries, religion, and other subjects. Some submissions contain words of grief, loss, and solace; others are strident in their desire for revenge; yet others long for a world free from hatred and violence. Some individuals talk about the burst of patriotism after the attacks, or write about the economic impact of the events. Some essayists write about their visits to New York City and the World Trade Center before or after the attacks. A few individuals note that Sept. 11 has other, personal meanings for them, as it was already a birthday, anniversary, or other significant date for them.

Religion is one of several prominent themes. Some individuals looked to their own faith and religion for solace and hope – or encouraged others to do the same. Muslims and persons of Middle Eastern descent talk about what their experiences have been like in the wake of the attacks, and articulate their beliefs. Christians express a wide range of views about their country, the world, and their faith. Persons of both faiths express their confidence that there is a Greater Power in control of events. Persons of other faiths also write about what the events mean to them in context of their beliefs.

Military action, politics, and patriotism are also prominent subjects. Some adults write of their confidence in national leaders and the military; others question political rhetoric and the necessity for military action. Comparisons are made to earlier wars and difficult times in our nation's history. Veterans of earlier conflicts share their views. Numerous writers recall or compare the Pearl Harbor attack of 1941 with the events of Sept. 11, 2001.

Writers often tell about how their lives or their outlook upon life has changed. Some changes are emotional – feeling closer to family, being more courteous to others, a stronger faith in God, a greater sense of unity as a country, and increased patriotism. A few people write about having greater questions or doubt about a Power of the Universe, or their belief that the United States is acting rashly out of revenge. Some write about an increased or decreased sense of security. Some of the changes mentioned are concrete changes in daily life. These include subjects such as security procedures at airports and sporting events; economic hardships; or increased charitable work.

Even individual words often are analyzed and exemplified in some of the essays. Topics such as “patriotism” and “heroes” are especially popular subjects, and often make special mention of firefighters, police officers, medical practitioners, military personnel and ordinary Americans like those who perished in the Sept. 11 attacks.

A wide range of individuals participated in the project. Numerous submissions from children reveal their hopes and fears, and their interpretations of the events of Sept. 11, 2001. Parents and others wonder about the future for their children and their nation. A significant number of submissions also come from teachers. Older persons write of their confidence in their country, with the experience of having been through hard times before.

### **Organization/Arrangement of Materials**

**Organization:** Organized into four series, by genre: I. Essays; II. Poems; III. Photographs; IV. Songs and music. The Essays series is subdivided into two subseries: A. Individuals; B. Schools

**Arrangement:** Alphabetical by name of author or submitter.

### **Restrictions**

**Restrictions on Access:** In library use only. Available by appointment.

Residential street addresses, phone numbers, fax numbers and email addresses were redacted by Nashville Public Library staff, since this information was not published in the newspaper or on the Tennessean's website. A photocopy with redactions was placed in the publicly-accessible research collection.

Original submissions containing this information reside in the Gannett/Tennessean donor file; are divided into "Essay" and "Poems" series, just as they are within the research collection; and are closed to the public, as a policy of the Special Collections Division of the Nashville Public Library.

**Restrictions on Use and Reproduction:**

Copyright retained by Gannett Satellite Information Network Inc. /The Tennessean

**Index Terms**

**Personal Names:**

Bush, George W. (George Walker), 1946- -- Public opinion

**Subjects:**

Anxiety -- Social aspects -- United States  
Belief and doubt  
Bush, George W. (George Walker), 1946---Public opinion  
Children -- Tennessee -- History -- 21<sup>st</sup> century -- Sources  
Children and terrorism -- United States -- Psychological aspects  
Children's drawings -- Tennessee  
Children's writings, American -- Tennessee  
Christianity -- United States -- 21<sup>st</sup> century  
Christians -- Tennessee  
Families of military personnel -- United States  
Fear -- Political aspects -- United States  
Fire fighters -- United States -- Public opinion  
Grief -- Personal narratives  
Grief -- Social aspects  
Heroes -- United States -- Anecdotes  
Muslims -- Middle East -- Public opinion  
Muslims -- Tennessee  
Older people -- Tennessee  
Parent and child -- Tennessee  
Patriotism -- United States  
Police -- United States -- Public opinion  
Politics and culture -- United States  
Religion and international affairs -- Public opinion  
School children -- Tennessee  
September 11 Terrorist Attacks, 2001 -- Anniversaries, etc.  
September 11 Terrorist Attacks, 2001 -- Poetry  
September 11 Terrorist Attacks, 2001 -- Songs and music  
Teachers -- Tennessee  
Terrorism -- United States -- History -- 21<sup>st</sup> century -- Sources

Terrorism -- United States -- Public opinion  
Terrorism and mass media -- United States  
War on Terrorism, 2001-

**Places:**

Afghanistan -- Foreign public opinion, American  
Iraq -- Foreign public opinion, American  
Islamic countries -- Foreign public opinion, American  
Middle East -- Foreign public opinion, American  
Nashville (Tenn.) -- History -- 21<sup>st</sup> century -- Sources  
Tennessee -- History -- 21<sup>st</sup> century -- Sources  
Tennessee--Religion  
United States -- Economic conditions -- 21<sup>st</sup> century

**Genre/Document Types:**

Drawings  
Essays  
Narratives (document genres)  
Poems  
Songs

**Occupations:**

Fire fighters  
Police  
Teachers

**Administrative Information**

**Additional Physical Form Available:** The special section of the *Tennessean* newspaper in which many of the submissions were published on Sept. 12, 2002, is available on microfilm in the Special Collections Division.

**Location of Originals/Duplicates:** Originals from which redacted copies were made are located in the donor file, and are closed to public access.

**Copyright:** Copyright retained by Gannett Satellite Information Network Inc./ The Tennessean

**Preferred Citation:** *Tennessean* Tribute to America Collection, Special Collections Division, Nashville Public Library.

**Immediate Source of Acquisition:** Gannett Satellite Information Network Inc./ The Tennessean; Gift; 2002. Acc. 2002.071

**Ownership and Custodial History:** The *Tennessean* solicited contributions from the public in August 2002. Materials became the physical and intellectual property of the *Tennessean* upon submission. The collection was obtained by the Nashville Public Library from the *Tennessean* in October 2002.

**Processing Information:** Processed by Linda Barnickel, 2007-2008. Volunteer Alice Swanson compiled name index and folder list, 2008. See redaction information elsewhere in this finding aid. Towns have been added by staff to items when a submission did not have this information, but an accompanying envelope did. Envelopes were discarded. Most submissions have a large pen stroke across them; this was a notation made by staff at the *Tennessean*.

**Accruals:** No further accruals are expected.

## References to Works by or about Collection Creator/Topic

Many submissions to the *Tennessean* which are in this collection appeared in a special section of the newspaper published on Sept. 11, 2002, entitled "Tribute to America."

## Detailed Description of the Collection

### Series I. Essays

#### Sub-series A. Individuals

**Series Abstract/Description:** Essays submitted by individuals.

**Arrangement:** Alphabetical by last name of individual.

#### Container List

### Box 1

#### Folder 1 – Surnames A-B

| NAME               | CITY             | NOTES                         |
|--------------------|------------------|-------------------------------|
| Anonymous          |                  |                               |
| Aguila, Norma A.   | Nashville, TN    |                               |
| Anderson, Joan     | Nashville, TN    |                               |
| Bailey, John       | Nashville, TN    |                               |
| Batey, Laura       | Williamsport, TN | Age 12                        |
| Batson, Nancy W.   | Ashland City, TN |                               |
| Bickell, Sara      | Nashville, TN    |                               |
| Blaylock, Joyce    | Nashville, TN    | Overton High teacher          |
| Bond, Randall M.   | Smithville, TN   |                               |
| Bracey, Dorothy    | Nashville, TN    |                               |
| Bradley, Roy K.    | Franklin, TN     |                               |
| Brady, Kristin     | Nashville, TN    | Wife of Nashville firefighter |
| Briley, Meggie     | Gallatin, TN     | Age 10                        |
| Broughton, Anthony |                  |                               |
| Burns, Kim H.      | Nashville, TN    |                               |

**Folder 2 – Surnames C**

| NAME                          | CITY               | NOTES                                        |
|-------------------------------|--------------------|----------------------------------------------|
| Campen, David                 | Hendersonville, TN |                                              |
| Carlisle, H.                  | Brentwood, TN      |                                              |
| Chermack, Mrs. Joanne Sanford | Nashville, TN      |                                              |
| Clary, Roy and Shirley        | Nashville, TN      |                                              |
| Coakley, Linda                | Bowling Green, KY  | Poem with illustration<br>attached to letter |
| Cole, Mary K. H.              | Nashville          | Disabled veteran                             |
| Cook, R. J. III               | Only, TN           |                                              |
| Crafton, Heather              | Tullahoma, TN      |                                              |
| Crigler, Mrs. John P.         | Shelbyville, TN    |                                              |
| Croghan, Wendi                | Lewisburg, TN      |                                              |
| Cronin, Janis                 |                    |                                              |

**Folder 3 – Surnames D**

| NAME                  | CITY           | NOTES                                                                  |
|-----------------------|----------------|------------------------------------------------------------------------|
| Davidson, Steve       | Greenbrier, TN |                                                                        |
| Davis, Foster         | Nashville, TN  | Prisoner at Cockrill<br>Bend, article about his<br>heroic Army service |
| Davis, Jerri          | Brentwood, TN  |                                                                        |
| Davis, Tonya          | Oak Grove, KY  |                                                                        |
| DeHart, Julia         | Nashville, TN  |                                                                        |
| Delaney, Ann          | Tullahoma, TN  |                                                                        |
| DelPriore, Melody Ann | Nashville, TN  |                                                                        |
| Drown-Murphy, Devie   | Laverne, TN    |                                                                        |
| Duncan, Mae L.        | Columbia, TN   |                                                                        |
| Dunn, Abigail         |                |                                                                        |

**Folder 4 – Surnames E-G**

| NAME                   | CITY          | NOTES                                                  |
|------------------------|---------------|--------------------------------------------------------|
| Edmonds, Julianna      | Columbia, TN  | 7 <sup>th</sup> grade –<br>Whitthorne<br>Middle School |
| Edmondson-Holt, Sylvia | Nashville, TN |                                                        |
| Estes, Julia           | Franklin, TN  |                                                        |
| Francis, Robert S.     | Nashville, TN |                                                        |



|                    |                |                                                           |
|--------------------|----------------|-----------------------------------------------------------|
| Frawley, Fred      | Nashville, TN  | Dean of Middle School – Franklin Road Academy             |
| Gates, Larry       | Nashville, TN  |                                                           |
| Geary-Pyatt, Deana | Nashville, TN  |                                                           |
| Gladsden, Holly    | Smyrna, TN     |                                                           |
| Gordon, Gloria R.  | Manchester, TN | Includes color photograph of patriotic painting by Gordon |

### Folder 5 – Surnames H

| NAME                    | CITY               | NOTES                                      |
|-------------------------|--------------------|--------------------------------------------|
| Hall, Ruthann           | Nashville, TN      |                                            |
| Haney, Ms. Lisa         | Spring Hill, TN    |                                            |
| Haney, Mike             |                    |                                            |
| Heusel, Earl            | Franklin, TN       |                                            |
| Hanvy, Brandi Lee       | Nashville, TN      |                                            |
| Hardy, Don              | Estill Springs, TN |                                            |
| Harkin, Jamie Johnson   | Brentwood, TN      | Grade 7, age 13<br>Brentwood Middle School |
| Henry, G. Steven        | Ashland City, TN   |                                            |
| Hirst, Ronda            | Nashville, TN      |                                            |
| Hobody, Keyana          | Hendersonville, TN |                                            |
| Howard, Sharon          | Nashville, TN      |                                            |
| Hussain, Jane Steinfels | Nashville, TN      |                                            |

### Folder 6 – Surnames J-L

| NAME                 | CITY            | NOTES                                 |
|----------------------|-----------------|---------------------------------------|
| Johns, Susan Childs  | Nashville, TN   |                                       |
| Juergens, Elizabeth  | Clarksville, TN | Age 14                                |
| Juergens, Hannah     | Clarksville, TN | Age 11                                |
| Juergens, Mary       | Clarksville, TN | Age 9                                 |
| Kay-Wheeler, Arzella | Nashville, TN   |                                       |
| Kirby, Diana         | Clarksville, TN | Age 10                                |
| Lamb, Rachael        | Crossville, TN  | 8 <sup>th</sup> grade<br>homeschooler |
| Lapinsky, Jenifer S. | Franklin, TN    |                                       |
| Lewis, William       | Brentwood, TN   |                                       |
| Lindsey, Jeanne      | Franklin, TN    |                                       |
| Lough, Posy          | Murray, KY      |                                       |

Luna, Jamie

Franklin, TN

Age 16 – junior at  
Battle Ground  
Academy

### **Folder 7 – Surnames M**

NAME

CITY

NOTES

Marshall, Scott

Nashville, TN

Anniv. of son's death  
on 9/11/93

McClain, Peggy

Mt. Pleasant, TN

McInteer, Jim Bill

Nashville, TN

Michanowicz, Dawn

Weston, MA

Millsaps, Rt. Rev. William

Monteagle, TN

Presiding Bishop of  
the Episcopal  
Missionary Church

Mitchell, Yvonne

White House, TN

Moore, Randy

Nashville, TN

Moore, Steve

Cookeville, TN

Moore, Tiffany

Muck, Laura

Brentwood, TN

Age 14

Mullins, Lila B.

Nashville, TN

### **Folder 8 – Surnames N-P**

NAME

CITY

NOTES

Nelson, Carole

Nashville, TN

Nicholson, Maria

Nashville, TN

Age 12 – St. Henrys  
School  
9/11/41 Birthday

Oden, Hallie

Nashville, TN

Owen, Mary W.

Nashville, TN

Pace, June

Ashland City, TN

Husband motorcycle  
accident 9/11/01

Parrish, Nan Nelson

Nashville, TN

Patterson, M. Todd

Murfreesboro, TN

### **Folder 9 – Surnames R**

NAME

CITY

NOTES

Rae, Ollie

Nashville, TN

Age 85

Reeves, Melissa

Cookeville, TN

Richardson, Susan West

|                                |                          |                                              |
|--------------------------------|--------------------------|----------------------------------------------|
| Rodgers, Harley                | Franklin, TN             |                                              |
| Rodocker, Inez                 | Nashville, TN            |                                              |
| Rose, Lynn                     | Mt. Juliet, TN           |                                              |
| Rosenquist, Bradford (author?) | Frankenlust Township, MI | Letter to New York City mayor, Rudy Giuliani |
| Riddle, Wesley D.              |                          |                                              |
| Ryals, DeLane M.               | Nashville, TN            |                                              |
| Ryan, Diane                    | Charlotte, TN            | Age 14                                       |

### Folder 10 – Surnames S

| NAME                   | CITY             | NOTES                                                                    |
|------------------------|------------------|--------------------------------------------------------------------------|
| Saal, Jeremy Alexander | Nashville, TN    | Age 11                                                                   |
| Santana, Jude          | Camden, TN       | Articles attached                                                        |
| Schlater, Mrs. Jane V. | Nashville, TN    |                                                                          |
| Scruggs, Andrew        |                  |                                                                          |
| Smith, Minister E. F.  | Nashville, TN    |                                                                          |
| Stanford, Nancy        | Murfreesboro, TN |                                                                          |
| Sutherland, Emily      |                  | In class essay – freshman English at Western Kentucky Univ. on 9/12/2001 |

### Folder 11 – Surnames T

| NAME                      | CITY               | NOTES                |
|---------------------------|--------------------|----------------------|
| Tally(?), Kelly           | Dickson County, TN | Age 13               |
| Tankesly, Calvin O. Jr.   | Hendersonville, TN |                      |
| Taylor, Lorine M.         |                    |                      |
| Taylor, Patricia          | Madison, TN        |                      |
| Threet, Ewing J. DDS      | Manchester, TN     |                      |
| Thurman, James O.         | Gallatin, TN       | Shafer Middle School |
| Tice, William R.          | Nashville, TN      |                      |
| Tilley, Tiffany Denise L. |                    | Age 11               |
| Tomberlin, Anita A.       | Hopkinsville, KY   |                      |
| Turner, Caleb             | South Fulton, TN   | South Fulton Elem.   |

## Folder 12 – Surnames V-Y

| NAME                   | CITY             | NOTES   |
|------------------------|------------------|---------|
| Vann, Mary             | Nashville, TN    |         |
| Wagonfield, Bonnie     | Nashville, TN    |         |
| Walker, Jack D.        | Antioch, TN      |         |
| Walp, Ruth             | Nashville, TN    |         |
| Wauford, Reba          |                  |         |
| Weatherford, Charlene  |                  | Student |
| Yewell, Pamala Pollard | Memphis, TN      |         |
| Young, Carroll M.      | Nashville, TN(?) |         |

### Series I. Essays

#### Sub-series B. Schools

**Series Abstract/Description:** Essays submitted as a group by students and teachers in schools.

**Arrangement:** Alphabetical by name of town, thereunder alphabetical by name of school. Although student names appear alphabetically in the list that follows, materials are unarranged within folders.

#### Container List

## Folder 13 – Columbia, TN – Christian Heritage Academy

|                       |                        |
|-----------------------|------------------------|
| Alexander, Krystal    |                        |
| Boyett, Aaron         | 12 <sup>th</sup> grade |
| Clark, Todd           |                        |
| Frazier, Antonio      | 11 <sup>th</sup> grade |
| Johnson, Kent         | 11 <sup>th</sup> grade |
| Johnson, Natalie      | 8 <sup>th</sup> grade  |
| Little, Kerri         |                        |
| Shay, Tim             | 12 <sup>th</sup> grade |
| Stephens, Conne [sic] | 12 <sup>th</sup> grade |
| Stinnett, Jordan      |                        |
| Winnett, Terry Ruth   | 11 <sup>th</sup> grade |
| Workman, Kay          | 11 <sup>th</sup> grade |
| Wright, Jesse         | 12 <sup>th</sup> grade |
| Zimmer, Jeremy        | 12 <sup>th</sup> grade |

## Folder 14 – Franklin, TN – Franklin High School

Banner, Lauren  
Jackson, Brittany  
Raccuglia, Joe

**Folder 15 – Gallatin, TN – Gallatin High School - [Group 1]**

Bransford, Wesley Allen  
Ferguson, Lindsey  
Foutch, Brittany  
Illegible  
Jackson, Tammy  
Johnson, Drew  
Joseph, Jimmy  
Merryman, Beth  
Roach, Erin  
Sullivan, Renice  
Tenpenny, Kellye  
Thompson, Brandon  
Tucker, Giner  
Warren, Ashley  
Yeh, Emily

Age 14

**Folder 16 – Gallatin, TN – Gallatin High School – [Group 2]**

Butler, Chase  
Crampton, Cory  
Critchelon, Lindsey  
Doss, Tiffany  
Ferguson, Erin  
Hatley, Jessica  
Keene, Zak  
McClendon, Rachael  
Moore, Raquel  
West, Jimmy  
Williams, Raquel

Age 14

**Folder 17 – Gallatin, TN – Gallatin High School – 9<sup>th</sup> grade**

Ayre, Andrew  
Bailey, Karissa  
Beasley, Erica  
Brazzell, Chara  
Britton, Kirona  
Crook, Brittany  
Foster, Manda  
Harned, Taylor  
Jones, Brenton  
Keene, Zak  
Mayberry, Bryson

Mitchell, Deandra  
 O'Neal, Angela  
 Pruett, Nathan  
 Rearick, Michael  
 Rogers, Misty  
 Satterfield, Matthew  
 Shaw, Brad  
 Shelton, Kayla  
 Sloan, Jessica  
 Toney, Brittany

**Folder 18 – Gallatin, TN – Gallatin High School – Keya Wilson's 10<sup>th</sup> grade**

|                     |        |
|---------------------|--------|
| Coward, Carlos      |        |
| Duck, Chinitta L.   | Age 18 |
| Edds, Ben           | Age 15 |
| Edwards, Emily      | Age 15 |
| Hale, Jessica       |        |
| Jett, Coty          |        |
| Link, Rossi         |        |
| Lytton, D. J.       |        |
| Matejka, Elizabeth  | Age 16 |
| McFerren, Jenifer   | Age 16 |
| McGuire, Cynthia    |        |
| Parker, Edward      | Age 16 |
| Pemberton, Crystal  |        |
| Skidmore, Stephanie | Age 15 |
| Taylor, Edward      | Age 15 |
| Walker, Zack Ryan   | Age 16 |
| Yorlano, Craig      |        |

**Folder 19 – Gallatin, TN – Rucker Stewart Middle School**

|                      |        |
|----------------------|--------|
| Meador, Kristin      |        |
| Weaver, Amanda       | Age 13 |
| Willbanks, Elizabeth | Age 13 |

**Folder 20 – Madison, TN – St. Joseph School**

(All include illustrations – subject of illustrations given at right)

|                    |                        |
|--------------------|------------------------|
| Bava, Jessie       | Tower, plane, people   |
| Bright, Andrea (2) | Flag, pole, sky, tower |
| Callahan, Brittany | Towers, flag, 2 people |
| Carter, Evan (2)   | Towers, fire, smoke    |

Catignani, Matthew  
Curtis, Christopher  
Duzane, Anna  
Folse, Autumn  
Galvin, Sarah  
Hayden, Taylor  
Honious, Ryan  
Lakers, Mary Francis  
No Name  
Odell, Katie  
Smith, Kyle  
Spain, Meagan

Tohill, Sintia

Waddle, Amanda (2)

Weakley, Charlea  
Webb, Catherine  
Welker, Kayla  
Yates, Mary Katherine

#### **Folder 21 – Murfreesboro, TN – St. Rose School**

Johnson, Hillary  
Sulkowski, Emma

#### **Folder 22 – Nashville, TN – Bethlehem Center**

Brown, Asia  
Hunter, Deonte

Moore, Rachael  
Pender, Janaye

#### **Folder 23 – Nashville, TN – Brick Church Middle School**

B., Brittney  
Batey, LaBreesha  
Copeland, Ashley

Towers, other bldgs.

Towers  
Towers, plane, cross  
Photo of flag  
3<sup>rd</sup> grade, tower, plane  
Towers  
Sun, star, flag  
Girl w/flag, large flag  
Towers, 2 planes, fire  
Plane & towers  
3<sup>rd</sup> grade, Statue of  
Liberty  
3<sup>rd</sup> grade, towers,  
church  
Flag  
People, flag, sun, etc.  
Flag  
3<sup>rd</sup> grade, towers  
Towers, fire, crosses  
Large flag

7<sup>th</sup> grade  
6<sup>th</sup> grade

6<sup>th</sup> grade JFK Middle  
5<sup>th</sup> grade John Early  
Middle  
Antioch High School  
4<sup>th</sup> grade Park Avenue  
School

**Folder 24 – Nashville, TN – East Literature Magnet School**

|                     |                       |
|---------------------|-----------------------|
| Cunningham, Reggie  |                       |
| Dennis, Dominique   |                       |
| Gill, Jasmine       | 7 <sup>th</sup> grade |
| Harrington, K’La D. | 8 <sup>th</sup> grade |
| Hogg, Tiffany       |                       |
| Joplin, Cori        | 8 <sup>th</sup> grade |
| Sawyers, ShonTa’    |                       |
| Scott, Jeremy       |                       |
| Winters, Tom        |                       |

**Folder 25 – Nashville, TN – Glendale Middle School - Gail Giles 6<sup>th</sup> grade**

|                   |                       |
|-------------------|-----------------------|
| Ansel, Lorah      |                       |
| Boggs, Alexia     |                       |
| Johnson, Courtney |                       |
| Liden, Benjamin   |                       |
| McCann, Hannah    |                       |
| Powell, Justin    |                       |
| Stubbs, Rachel    |                       |
| Templin, Robert   | 6 <sup>th</sup> grade |

**Folder 26 – Nashville, TN – Hillsboro Middle School**

|                                |                      |
|--------------------------------|----------------------|
| Berger, Josiah                 | Age 12               |
| Callahan, Alexa                | Age 11 – illustrated |
| Cooper, Josh                   | Age 13               |
| Dodd, Chelsea                  | Age 11               |
| Godwin, Lauren                 | Age 12               |
| Griggs, Jessica                | Age 13               |
| Hayden, Zack                   | Age 13               |
| Mains, Coulter                 | Age 14               |
| Osborne, Misty                 | Age 13               |
| Powers, Rebecca                | Age 13               |
| Shaw, Chris & Hutchinson, Mark | Age 13 & age 12      |
| Turvene, Jen                   | Age 13               |

**Folder 27 – Nashville, TN – Hillsboro Middle School – Ellen James’s Social Studies Class**

|                  |                      |
|------------------|----------------------|
| Beard, Christina | Age 11 - illustrated |
| Beard, Kristin   | Age 11               |
| Davidson, David  |                      |



|                      |                               |
|----------------------|-------------------------------|
| Doan, Brittany       | 6 <sup>th</sup> Grade, age 11 |
| Dunning, Ryan        |                               |
| Flys, Sam            |                               |
| Hawsey, Will         |                               |
| Hendill, Caitlyn     | Sept. 11 - birthday           |
| Ho, Sally            |                               |
| Hockeweg, Brittni    |                               |
| J., Charlotte        |                               |
| J., Tommy            |                               |
| James, Micah         | Age 11                        |
| Locke, Sally         | Age 13                        |
| Miller, Ian          |                               |
| Mitchell, Beth       | Age 12                        |
| Painter, Nicholas    | Age 11                        |
| Paul, Matt           |                               |
| Ross, Jonathan       |                               |
| Thudd, Alannah Denee |                               |
| West, Kelly          | Age 11                        |

**Folder 28 – Nashville, TN – Nashville Academy**

|                   |               |
|-------------------|---------------|
| Beecham, Brooke   | Age 16        |
| Burrows, Craig    | Age 18 – poem |
| Mitchell, Corey   | Age 15 – poem |
| Turntine, Matthew | Age 18 – poem |
| Zimmerer, Patrick | Age 16 – poem |

**Folder 29 – Nashville, TN – Westmeade Elementary**

Carmona, Daniel  
 Gore, Edward  
 Hummer, Cicily  
 Kasper, Andrew  
 Kim, Susan  
 Langley, Tyler  
 Logan, Emily  
 Lovelace, Chloe  
 May, Zachary  
 Wathan, Erin

**Folder 30 – Nashville, TN – Westmeade Elementary – Ms. Bryan’s class**

Adams, Amanda  
 Brewer, Rachel  
 Buck, Justin

Causey, Alexander  
Fisher, Linda  
Fonseca, Samantha  
Foster, Brandon  
Goldberg, Mattie  
Kagawa, Kosuke  
Murray, Erica  
Pease, Caleb  
Ryniak, Liz  
Sterritt, Stephanie  
Witherington, Aubrey

4<sup>th</sup> grade

## **BOX 2**

### **Folder 31 – Three Springs Duck River (Hickman County, TN)**

B., Beau  
C., Alex  
D., Eric  
D., Steve  
E., Beau  
E., Joe  
E., Jonathan  
E., Michael  
F., David  
F., Kevin  
G., Byron  
G., Mike  
G., Peter  
H. Micah  
H., David  
H., Eric  
H., Josh  
H., Nick  
H., Trey  
H., Tyler  
J., P.  
Josh  
L., Ben  
L., James  
M., J.  
M., Jeff  
M., Rob  
N., Ryan  
O'H, Pat

10<sup>th</sup> grade

Illustrated

S., C.  
S., David  
S., David  
S., Grant  
T., A.  
T., Harry  
W., Charles  
W., Josh  
W., Ryan  
Y., Stephen

14 years old

**Folder 32 – Tullahoma, TN – East Middle School – 7<sup>th</sup> Grade**

DaCosta, Sara  
Daugherty, Julia  
Mackay, Patrick  
Williams, Britta

**Folder 33 – Woodbury, TN – Short Mountain Elementary – 6<sup>th</sup> Grade**

Anonymous  
Anonymous  
Bradley  
Broka  
Carolyn  
Chris  
Eden  
Kayla  
Mingle, Brittany Leanna  
Molly  
Wanamaker, Heather  
Wesley  
Whiting, Megan  
Whittemore, Kyle

**Folder 34 – Unidentified – probably elementary**

Alfaleh, Mohammad  
Brown, Alice  
Cornelius, Isaiah  
Evans, Stacey  
Gordon, Rockitta  
Harper, Jordan  
King, Taylor  
Lakel, Yacine

Lovell, Ben  
 Lowery, Lindsey  
 Mondeh, Tamba  
 Morales, Antonio  
 Pangburn, Brooke  
 Silva, Ryne  
 Stewart, Lyndsey  
 Vonkx, Emily

## Series II. Poems

**Series Abstract/Description:** Poems and a few song lyrics (without musical accompaniment) submitted to the *Tennessean*.

**Arrangement:** Alphabetical by last name of author.

### Container List

## Folder 35 - Poems

| NAME                       | CITY or SCHOOL            | NOTES                                                  |
|----------------------------|---------------------------|--------------------------------------------------------|
| Adkins, Jamie              | Rockfield Elementary      | Age 10                                                 |
| Burns, Raymond             | Nashville, TN             |                                                        |
| Campbell, Brandon          | Fort Campbell High School |                                                        |
| Carbine, Kristen           | Franklin, TN              | 6 <sup>th</sup> grade                                  |
| Childs, Ralph              | Nashville, TN             | Song lyric                                             |
| Cothron, Kelley            | Old Hickory, TN           | Age 10                                                 |
| Dyer, Karen                | Nashville, TN             |                                                        |
| Goller, Erich J.           | Goodlettsville, TN        | Two poems                                              |
| Goodwin, Brittany          |                           | 9 <sup>th</sup> grade                                  |
| Hargrove, Sandy            | Smyrna, TN                |                                                        |
| Johnson, Brenda Rose       | Prospect, TN              |                                                        |
| Johnson, Sue               | Gallatin, TN              |                                                        |
| Lemon, Shelley             | Dyersburg, TN             | 6 <sup>th</sup> grade – age 12                         |
| Medeiros, Grant Thomas     | Clarksville, TN           |                                                        |
| Meeks, Lu-Ann Gale         | Nashville, TN             |                                                        |
| Sears, Rachel              | Thompsons Station, TN     | Age 15                                                 |
| Seibert, Tony              | Nashville, TN             | Song lyric                                             |
| Sloan, Henry Hall          | Arnold, MD                |                                                        |
| Sybinsky, Estrella Besinga | Franklin, TN              | Published poem                                         |
| Thayer, James              |                           | Age 14                                                 |
| Tidwell, Marlene           | Brentwood, TN             |                                                        |
| White, Barry B.            | Lewisburg, TN             |                                                        |
| Wiborg, Enid               | Murfreesboro, TN          | Comments on poem<br>by Jackie George of<br>Lebanon, TN |

### **Series III. Photographs**

**Series Abstract/Description:** Photographs submitted to the *Tennessean*.

**Arrangement:** Alphabetical by last name of photographer.

#### **Container List**

#### **Folder 36 - Photographs**

|               |               |
|---------------|---------------|
| Fowler, Grant | Nashville, TN |
|---------------|---------------|

#### **Folder 37 - Photographs**

|                    |               |                                      |
|--------------------|---------------|--------------------------------------|
| Stringfellow, Bill | Nashville, TN | Calendar –<br>Eagle Scout<br>project |
|--------------------|---------------|--------------------------------------|

### **Series IV. Songs and Music**

**Series Abstract/Description:** Recordings of musical and vocal performances submitted to the *Tennessean*.

**Arrangement:** Alphabetical by name of performer.

#### **Container List**

#### **Folder 38 – Bailey & Black**

|                                         |                  |             |
|-----------------------------------------|------------------|-------------|
| Bailey, Melinda Richarz<br>Black, Diana | Murfreesboro, TN | CD enclosed |
|-----------------------------------------|------------------|-------------|

#### **Folder 39 - Corbin**

|                 |                  |             |
|-----------------|------------------|-------------|
| Corbin, Everett | Murfreesboro, TN | CD enclosed |
|-----------------|------------------|-------------|

#### **Folder 40 - Martin**

|               |               |             |
|---------------|---------------|-------------|
| Martin, Sheri | Nashville, TN | CD enclosed |
|---------------|---------------|-------------|

#### **Folder 41 – Newton**

|                      |               |             |
|----------------------|---------------|-------------|
| Newton, Elijah Loyle | Nashville, TN | CD enclosed |
|----------------------|---------------|-------------|

#### **Folder 42 - Roads**

|              |                  |                    |
|--------------|------------------|--------------------|
| Roads, Dusti | Murfreesboro, TN | Lyrics on CD cover |
|--------------|------------------|--------------------|

#### **Folder 43 - Shapiro**

|                 |                 |             |
|-----------------|-----------------|-------------|
| Shapiro, Howard | Volcano, Hawaii | CD enclosed |
|-----------------|-----------------|-------------|

#### **Folder 44 - Tison**

|                        |  |                              |
|------------------------|--|------------------------------|
| Tison, Cheryl and John |  | CD recorded by<br>Zach Tison |
|------------------------|--|------------------------------|
